# Supplementary material for: Parameterization of the Age-Dependent Whole Brain Apparent Diffusion Coefficient Histogram
Source: Hindawi journal article supplement (doi:10.1155/2015/373716), 2015-01-01
Supplement: f1 [file 373716.f1.pdf]

Tab.1: Results, root mean square deviation and relative deviation from the fitting of the first part of the histogram, hist1, model 1, whole group

| Age Class | A [%] | $\mu$<br>[ $10^{-3}$ mm <sup>2</sup> /s] | $\sigma$<br>[ $10^{-3}$ mm <sup>2</sup> /s] | rmsd<br>[ $10^{-3}$ %] | relative rmsd<br>[ $10^{-2}$ ] |
|-----------|-------|------------------------------------------|---------------------------------------------|------------------------|--------------------------------|
| 1         | 7.16  | 0.76                                     | 0.98                                        | 0.58                   | 3.12                           |
| 2         | 6.93  | 0.76                                     | 0.98                                        | 0.76                   | 4.15                           |
| 3         | 6.76  | 0.75                                     | 0.99                                        | 0.74                   | 4.11                           |
| 4         | 6.48  | 0.75                                     | 1.03                                        | 0.75                   | 4.37                           |
| 5         | 6.28  | 0.75                                     | 1.07                                        | 0.65                   | 3.96                           |
| 6         | 5.90  | 0.76                                     | 1.14                                        | 0.57                   | 3.82                           |
| 7         | 5.45  | 0.77                                     | 1.17                                        | 0.46                   | 3.48                           |

Tab.2a: Results from the fitting of the first part of the histogram, hist1, model 2, whole group

| Age Class | A1 [%] | $\mu 1$<br>[ $10^{-3}$ mm <sup>2</sup> /s] | $\sigma 1$<br>[ $10^{-3}$ mm <sup>2</sup> /s] | A2 [%] | $\mu 2$<br>[ $10^{-3}$ mm <sup>2</sup> /s] | $\sigma 2$<br>[ $10^{-3}$ mm <sup>2</sup> /s] |
|-----------|--------|--------------------------------------------|-----------------------------------------------|--------|--------------------------------------------|-----------------------------------------------|
| 1         | 6.48   | 0.77                                       | 1.08                                          | 0.92   | 0.74                                       | 0.62                                          |
| 2         | 6.18   | 0.77                                       | 1.10                                          | 0.99   | 0.73                                       | 0.60                                          |
| 3         | 5.92   | 0.76                                       | 1.12                                          | 1.08   | 0.73                                       | 0.63                                          |
| 4         | 5.72   | 0.76                                       | 1.16                                          | 1.00   | 0.72                                       | 0.65                                          |
| 5         | 5.45   | 0.76                                       | 1.24                                          | 1.13   | 0.73                                       | 0.72                                          |
| 7         | 4.89   | 0.78                                       | 1.34                                          | 0.84   | 0.75                                       | 0.76                                          |

Tab.2b: Root mean square deviation and relative deviation from the fitting of the first part of the histogram, hist1, model 2, whole group

| Age Class | rmsd<br>[ $10^{-3}$ %] | relative rmsd<br>[ $10^{-2}$ ] |
|-----------|------------------------|--------------------------------|
| 1         | 0.26                   | 1.37                           |
| 2         | 0.25                   | 1.36                           |
| 3         | 0.24                   | 1.37                           |
| 4         | 0.26                   | 1.52                           |
| 5         | 0.23                   | 1.44                           |
| 6         | 0.22                   | 1.50                           |
| 7         | 0.26                   | 1.95                           |

Tab.2c: Results from the fitting of the first part of the histogram, hist1, model 2, 3 subgroups

| Subgroup | Age Class | A1 [%] | $\mu 1$<br>[ $10^{-3}$ mm <sup>2</sup> /s] | $\sigma 1$<br>[ $10^{-3}$ mm <sup>2</sup> /s] | A2 [%] | $\mu 2$<br>[ $10^{-3}$ mm <sup>2</sup> /s] | $\sigma 2$<br>[ $10^{-3}$ mm <sup>2</sup> /s] |
|----------|-----------|--------|--------------------------------------------|-----------------------------------------------|--------|--------------------------------------------|-----------------------------------------------|
| 1        | 1         | 6.42   | 0.77                                       | 1.09                                          | 0.95   | 0.74                                       | 0.61                                          |
| 1        | 2         | 6.25   | 0.76                                       | 1.05                                          | 0.88   | 0.72                                       | 0.57                                          |
| 1        | 3         | 5.88   | 0.76                                       | 1.13                                          | 1.09   | 0.72                                       | 0.64                                          |
| 1        | 4         | 5.71   | 0.76                                       | 1.15                                          | 0.99   | 0.72                                       | 0.63                                          |
| 1        | 5         | 5.50   | 0.77                                       | 1.25                                          | 1.09   | 0.73                                       | 0.70                                          |
| 1        | 6         | 5.29   | 0.78                                       | 1.31                                          | 1.05   | 0.73                                       | 0.70                                          |
| 1        | 7         | 4.75   | 0.79                                       | 1.33                                          | 0.94   | 0.74                                       | 0.81                                          |
| 2        | 1         | 6.54   | 0.77                                       | 1.08                                          | 0.89   | 0.75                                       | 0.62                                          |
| 2        | 2         | 6.24   | 0.76                                       | 1.09                                          | 0.94   | 0.73                                       | 0.61                                          |
| 2        | 3         | 5.94   | 0.77                                       | 1.12                                          | 1.07   | 0.73                                       | 0.63                                          |
| 2        | 4         | 5.77   | 0.77                                       | 1.16                                          | 0.93   | 0.73                                       | 0.64                                          |
| 2        | 5         | 5.53   | 0.76                                       | 1.23                                          | 1.08   | 0.72                                       | 0.68                                          |
| 2        | 6         | 5.16   | 0.78                                       | 1.37                                          | 1.00   | 0.73                                       | 0.73                                          |
| 2        | 7         | 4.71   | 0.79                                       | 1.37                                          | 0.97   | 0.74                                       | 0.80                                          |
| 3        | 1         | 6.42   | 0.77                                       | 1.07                                          | 0.91   | 0.74                                       | 0.64                                          |
| 3        | 2         | 6.17   | 0.77                                       | 1.11                                          | 0.96   | 0.74                                       | 0.62                                          |
| 3        | 3         | 5.99   | 0.76                                       | 1.10                                          | 1.07   | 0.72                                       | 0.62                                          |
| 3        | 4         | 5.79   | 0.76                                       | 1.16                                          | 0.99   | 0.72                                       | 0.64                                          |
| 3        | 5         | 5.46   | 0.77                                       | 1.24                                          | 1.10   | 0.72                                       | 0.68                                          |
| 3        | 6         | 5.23   | 0.78                                       | 1.32                                          | 1.04   | 0.73                                       | 0.71                                          |
| 3        | 7         | 4.80   | 0.78                                       | 1.31                                          | 0.97   | 0.74                                       | 0.80                                          |

Tab.2d: Root mean square deviation and relative deviation from the fitting of the first part of the histogram, hist1, model 2, 3 subgroups

| Subgroup | Age<br>Class | rmsd<br>[10 <sup>-3</sup> %] | relative rmsd<br>[10 <sup>-2</sup> ] |
|----------|--------------|------------------------------|--------------------------------------|
| 1        | 1            | 0.28                         | 1.52                                 |
| 1        | 2            | 0.29                         | 1.56                                 |
| 1        | 3            | 0.24                         | 1.35                                 |
| 1        | 4            | 0.31                         | 1.79                                 |
| 1        | 5            | 0.23                         | 1.40                                 |
| 1        | 6            | 0.22                         | 1.45                                 |
| 1        | 7            | 0.31                         | 2.34                                 |
| 2        | 1            | 0.25                         | 1.33                                 |
| 2        | 2            | 0.24                         | 1.30                                 |
| 2        | 3            | 0.26                         | 1.47                                 |
| 2        | 4            | 0.25                         | 1.46                                 |
| 2        | 5            | 0.22                         | 1.35                                 |
| 2        | 6            | 0.21                         | 1.44                                 |
| 2        | 7            | 0.23                         | 1.81                                 |
| 3        | 1            | 0.27                         | 1.47                                 |
| 3        | 2            | 0.31                         | 1.71                                 |
| 3        | 3            | 0.28                         | 1.54                                 |
| 3        | 4            | 0.23                         | 1.31                                 |
| 3        | 5            | 0.22                         | 1.37                                 |
| 3        | 6            | 0.23                         | 1.54                                 |
| 3        | 7            | 0.27                         | 2.00                                 |

Tab.2e: Results from the fitting of the first part of the histogram, hist1, model 2, male and female patients

| Sex    | Age<br>Class | A1<br>[%] | $\mu 1$<br>[ $10^{-3}$ mm <sup>2</sup> /s] | $\sigma 1$<br>[ $10^{-3}$ mm <sup>2</sup> /s] | A2<br>[%] | $\mu 2$<br>[ $10^{-3}$ mm <sup>2</sup> /s] | $\sigma 2$<br>[ $10^{-3}$ mm <sup>2</sup> /s] |
|--------|--------------|-----------|--------------------------------------------|-----------------------------------------------|-----------|--------------------------------------------|-----------------------------------------------|
| female | 1            | 6.46      | 0.77                                       | 1.09                                          | 0.89      | 0.73                                       | 0.61                                          |
| female | 2            | 6.22      | 0.76                                       | 1.08                                          | 0.97      | 0.73                                       | 0.60                                          |
| female | 3            | 5.94      | 0.76                                       | 1.10                                          | 1.13      | 0.73                                       | 0.63                                          |
| female | 4            | 5.73      | 0.76                                       | 1.15                                          | 1.01      | 0.72                                       | 0.63                                          |
| female | 5            | 5.51      | 0.77                                       | 1.23                                          | 1.14      | 0.72                                       | 0.67                                          |
| female | 6            | 5.27      | 0.78                                       | 1.29                                          | 1.10      | 0.73                                       | 0.71                                          |
| female | 7            | 4.69      | 0.78                                       | 1.28                                          | 1.01      | 0.74                                       | 0.83                                          |
| male   | 1            | 6.52      | 0.77                                       | 1.07                                          | 0.89      | 0.75                                       | 0.61                                          |
| male   | 2            | 6.12      | 0.77                                       | 1.11                                          | 0.97      | 0.73                                       | 0.61                                          |
| male   | 3            | 5.96      | 0.77                                       | 1.15                                          | 0.97      | 0.73                                       | 0.63                                          |
| male   | 4            | 5.79      | 0.76                                       | 1.18                                          | 0.95      | 0.73                                       | 0.64                                          |
| male   | 5            | 5.46      | 0.77                                       | 1.26                                          | 1.09      | 0.72                                       | 0.70                                          |
| male   | 6            | 5.11      | 0.78                                       | 1.36                                          | 1.06      | 0.73                                       | 0.74                                          |
| male   | 7            | 4.57      | 0.79                                       | 1.38                                          | 1.05      | 0.75                                       | 0.81                                          |

Tab.2f: Root mean square deviation and relative deviation from the fitting of the first part of the histogram, hist1, model 2, male and female patients

| Sex    | Age<br>Class | rmsd<br>[ $10^{-3}$ %] | relative rmsd<br>[ $10^{-2}$ ] |
|--------|--------------|------------------------|--------------------------------|
| female | 1            | 0.28                   | 1.51                           |
| female | 2            | 0.30                   | 1.65                           |
| female | 3            | 0.24                   | 1.33                           |
| female | 4            | 0.24                   | 1.39                           |
| female | 5            | 0.25                   | 1.50                           |
| female | 6            | 0.23                   | 1.50                           |
| female | 7            | 0.39                   | 2.88                           |
| male   | 1            | 0.24                   | 1.31                           |
| male   | 2            | 0.25                   | 1.41                           |
| male   | 3            | 0.24                   | 1.40                           |
| male   | 4            | 0.25                   | 1.46                           |
| male   | 5            | 0.22                   | 1.36                           |
| male   | 6            | 0.20                   | 1.38                           |
| male   | 7            | 0.22                   | 1.74                           |

Tab3a: Results from the fitting of the second part of the histogram, hist2, all patients

| Age<br>Class | A3<br>[%] | k3<br>[10 <sup>-3</sup> mm <sup>2</sup> /s] | A4<br>[%] | k4<br>[10 <sup>-3</sup> mm <sup>2</sup> /s] | A5<br>[10 <sup>3</sup> s/mm <sup>2</sup> ] | μ5<br>[%] | A6<br>[%] | μ6<br>[10 <sup>-3</sup> mm <sup>2</sup> /s] | σ6<br>[10 <sup>-3</sup> mm <sup>2</sup> /s] |
|--------------|-----------|---------------------------------------------|-----------|---------------------------------------------|--------------------------------------------|-----------|-----------|---------------------------------------------|---------------------------------------------|
| 1            | 3.82      | 0.07                                        | 1.46      | 0.28                                        | 0.06                                       | 0.21      | 0.05      | 2.49                                        | 2.20                                        |
| 2            | 3.36      | 0.07                                        | 1.26      | 0.31                                        | 0.07                                       | 0.24      | 0.09      | 2.64                                        | 2.29                                        |
| 3            | 3.24      | 0.07                                        | 1.08      | 0.32                                        | 0.08                                       | 0.27      | 0.18      | 2.69                                        | 2.67                                        |
| 4            | 2.92      | 0.07                                        | 1.03      | 0.32                                        | 0.09                                       | 0.31      | 0.24      | 2.70                                        | 2.82                                        |
| 5            | 2.99      | 0.08                                        | 0.86      | 0.34                                        | 0.10                                       | 0.33      | 0.34      | 2.71                                        | 2.69                                        |
| 6            | 3.08      | 0.09                                        | 0.67      | 0.43                                        | 0.11                                       | 0.37      | 0.45      | 2.74                                        | 2.91                                        |
| 7            | 3.16      | 0.10                                        | 0.51      | 0.49                                        | 0.12                                       | 0.42      | 0.64      | 2.79                                        | 2.94                                        |

Tab3b: Root mean square deviation and relative deviation from the fitting of the second part of the histogram, hist2, all patients

| Age<br>Class | rmsd<br>[10 <sup>-3</sup> %] | relative rmsd<br>[10 <sup>-2</sup> ] |
|--------------|------------------------------|--------------------------------------|
| 1            | 0.03                         | 1.39                                 |
| 2            | 0.02                         | 1.06                                 |
| 3            | 0.02                         | 0.86                                 |
| 4            | 0.02                         | 0.88                                 |
| 5            | 0.03                         | 1.05                                 |
| 6            | 0.03                         | 1.13                                 |
| 7            | 0.04                         | 1.36                                 |

Tab.3c: Results from the fitting of the second part of the histogram, hist2, 3 subgroups

| Sub Group | Age Class | A3 [%] | k3 [10 <sup>-3</sup> mm <sup>2</sup> /s] | A4 [%] | k4 [10 <sup>-3</sup> mm <sup>2</sup> /s] | A5 [10 <sup>3</sup> s/mm <sup>2</sup> ] | μ5 [%] | A6 [%] | μ6 [10 <sup>-3</sup> mm <sup>2</sup> /s] | σ6 [10 <sup>-3</sup> mm <sup>2</sup> /s] |
|-----------|-----------|--------|------------------------------------------|--------|------------------------------------------|-----------------------------------------|--------|--------|------------------------------------------|------------------------------------------|
| 1         | 1         | 3.62   | 0.07                                     | 1.54   | 0.26                                     | 0.06                                    | 0.22   | 0.06   | 2.50                                     | 1.80                                     |
| 1         | 2         | 3.20   | 0.06                                     | 1.25   | 0.31                                     | 0.07                                    | 0.24   | 0.09   | 2.64                                     | 2.15                                     |
| 1         | 3         | 3.06   | 0.07                                     | 1.12   | 0.31                                     | 0.08                                    | 0.28   | 0.17   | 2.68                                     | 2.58                                     |
| 1         | 4         | 2.70   | 0.07                                     | 1.07   | 0.30                                     | 0.09                                    | 0.32   | 0.22   | 2.69                                     | 2.85                                     |
| 1         | 5         | 3.14   | 0.08                                     | 0.79   | 0.36                                     | 0.10                                    | 0.33   | 0.36   | 2.69                                     | 2.56                                     |
| 1         | 6         | 3.16   | 0.09                                     | 0.68   | 0.41                                     | 0.10                                    | 0.36   | 0.44   | 2.74                                     | 2.96                                     |
| 1         | 7         | 3.09   | 0.10                                     | 0.55   | 0.51                                     | 0.12                                    | 0.40   | 0.66   | 2.78                                     | 3.10                                     |
|           |           |        |                                          |        |                                          |                                         |        |        |                                          |                                          |
| 2         | 1         | 4.06   | 0.07                                     | 1.48   | 0.28                                     | 0.06                                    | 0.20   | 0.04   | 2.43                                     | 2.69                                     |
| 2         | 2         | 3.48   | 0.07                                     | 1.19   | 0.31                                     | 0.07                                    | 0.24   | 0.10   | 2.62                                     | 2.21                                     |
| 2         | 3         | 3.46   | 0.07                                     | 1.01   | 0.32                                     | 0.08                                    | 0.28   | 0.18   | 2.69                                     | 2.57                                     |
| 2         | 4         | 3.10   | 0.07                                     | 1.03   | 0.33                                     | 0.09                                    | 0.30   | 0.24   | 2.70                                     | 2.79                                     |
| 2         | 5         | 3.00   | 0.08                                     | 0.85   | 0.36                                     | 0.09                                    | 0.32   | 0.32   | 2.72                                     | 2.74                                     |
| 2         | 6         | 3.02   | 0.10                                     | 0.66   | 0.44                                     | 0.11                                    | 0.39   | 0.46   | 2.74                                     | 2.88                                     |
| 2         | 7         | 3.26   | 0.11                                     | 0.45   | 0.53                                     | 0.12                                    | 0.42   | 0.70   | 2.81                                     | 2.90                                     |
|           |           |        |                                          |        |                                          |                                         |        |        |                                          |                                          |
| 3         | 1         | 3.74   | 0.07                                     | 1.40   | 0.30                                     | 0.06                                    | 0.21   | 0.05   | 2.54                                     | 2.48                                     |
| 3         | 2         | 3.39   | 0.07                                     | 1.33   | 0.30                                     | 0.07                                    | 0.25   | 0.09   | 2.66                                     | 2.43                                     |
| 3         | 3         | 3.25   | 0.07                                     | 1.08   | 0.32                                     | 0.07                                    | 0.26   | 0.19   | 2.68                                     | 2.92                                     |
| 3         | 4         | 2.97   | 0.07                                     | 1.01   | 0.32                                     | 0.09                                    | 0.31   | 0.24   | 2.72                                     | 2.78                                     |
| 3         | 5         | 2.90   | 0.08                                     | 0.90   | 0.32                                     | 0.10                                    | 0.35   | 0.34   | 2.73                                     | 2.70                                     |
| 3         | 6         | 3.06   | 0.09                                     | 0.67   | 0.42                                     | 0.11                                    | 0.38   | 0.43   | 2.75                                     | 2.86                                     |
| 3         | 7         | 3.24   | 0.10                                     | 0.48   | 0.63                                     | 0.11                                    | 0.37   | 0.64   | 2.80                                     | 3.00                                     |

Tab.3d: Root mean square deviation and relative deviation from the fitting of the second part of the histogram, hist2, 3 subgroups

| Subgroup | Age Class | rmsd<br>[10 <sup>-3</sup> %] | relative rmsd<br>[10 <sup>-2</sup> ] |
|----------|-----------|------------------------------|--------------------------------------|
| 1        | 1         | 0.03                         | 1.58                                 |
| 1        | 2         | 0.03                         | 1.21                                 |
| 1        | 3         | 0.02                         | 0.78                                 |
| 1        | 4         | 0.02                         | 0.92                                 |
| 1        | 5         | 0.04                         | 1.49                                 |
| 1        | 6         | 0.04                         | 1.38                                 |
| 1        | 7         | 0.05                         | 1.48                                 |
|          |           |                              |                                      |
| 2        | 1         | 0.04                         | 1.74                                 |
| 2        | 2         | 0.02                         | 1.05                                 |
| 2        | 3         | 0.03                         | 1.29                                 |
| 2        | 4         | 0.03                         | 1.05                                 |
| 2        | 5         | 0.03                         | 1.17                                 |
| 2        | 6         | 0.03                         | 1.09                                 |
| 2        | 7         | 0.06                         | 1.70                                 |
|          |           |                              |                                      |
| 3        | 1         | 0.03                         | 1.35                                 |
| 3        | 2         | 0.03                         | 1.54                                 |
| 3        | 3         | 0.02                         | 1.02                                 |
| 3        | 4         | 0.03                         | 1.04                                 |
| 3        | 5         | 0.03                         | 0.98                                 |
| 3        | 6         | 0.03                         | 1.21                                 |
| 3        | 7         | 0.05                         | 1.48                                 |

Tab.3e: Results from the fitting of the second part of the histogram, hist2, male and female patients

| Sex    | Age<br>Class | A3<br>[%] | k3<br>[10 <sup>-3</sup> mm <sup>2</sup> /s] | A4<br>[%] | k4<br>[10 <sup>-3</sup> mm <sup>2</sup> /s] | A5<br>[10 <sup>3</sup> s/mm <sup>2</sup> ] | μ5<br>[%] | A6<br>[%] | μ6<br>[10 <sup>-3</sup> mm <sup>2</sup> /s] | σ6<br>[10 <sup>-3</sup> mm <sup>2</sup> /s] |
|--------|--------------|-----------|---------------------------------------------|-----------|---------------------------------------------|--------------------------------------------|-----------|-----------|---------------------------------------------|---------------------------------------------|
| female | 1            | 3.65      | 0.07                                        | 1.45      | 0.30                                        | 0.06                                       | 0.20      | 0.04      | 2.52                                        | 2.52                                        |
| female | 2            | 3.35      | 0.07                                        | 1.25      | 0.32                                        | 0.07                                       | 0.23      | 0.09      | 2.62                                        | 2.10                                        |
| female | 3            | 3.13      | 0.07                                        | 1.13      | 0.31                                        | 0.08                                       | 0.26      | 0.17      | 2.70                                        | 2.65                                        |
| female | 4            | 2.84      | 0.07                                        | 1.03      | 0.32                                        | 0.09                                       | 0.31      | 0.23      | 2.72                                        | 2.75                                        |
| female | 5            | 2.98      | 0.08                                        | 0.86      | 0.36                                        | 0.09                                       | 0.32      | 0.33      | 2.71                                        | 2.61                                        |
| female | 6            | 3.19      | 0.09                                        | 0.71      | 0.44                                        | 0.10                                       | 0.34      | 0.41      | 2.75                                        | 2.86                                        |
| female | 7            | 3.10      | 0.10                                        | 0.58      | 0.44                                        | 0.12                                       | 0.41      | 0.56      | 2.82                                        | 2.86                                        |
| male   | 1            | 3.91      | 0.07                                        | 1.49      | 0.27                                        | 0.06                                       | 0.22      | 0.05      | 2.48                                        | 2.00                                        |
| male   | 2            | 3.36      | 0.07                                        | 1.28      | 0.29                                        | 0.08                                       | 0.26      | 0.11      | 2.67                                        | 2.60                                        |
| male   | 3            | 3.37      | 0.07                                        | 1.02      | 0.33                                        | 0.08                                       | 0.28      | 0.20      | 2.65                                        | 2.91                                        |
| male   | 4            | 3.05      | 0.08                                        | 1.02      | 0.32                                        | 0.09                                       | 0.31      | 0.24      | 2.68                                        | 2.87                                        |
| male   | 5            | 2.96      | 0.08                                        | 0.93      | 0.31                                        | 0.10                                       | 0.36      | 0.34      | 2.72                                        | 2.72                                        |
| male   | 6            | 3.01      | 0.09                                        | 0.66      | 0.41                                        | 0.12                                       | 0.40      | 0.47      | 2.73                                        | 2.93                                        |
| male   | 7            | 3.26      | 0.11                                        | 0.44      | 0.76                                        | 0.11                                       | 0.37      | 0.76      | 2.77                                        | 3.03                                        |

Tab.3f: Mean square deviation and relative deviation from the fitting of the second part of the histogram, hist2, male and female patients

| Sex    | Age<br>Class | rmsd<br>[10 <sup>-3</sup> %] | relative rmsd<br>[10 <sup>-2</sup> ] |
|--------|--------------|------------------------------|--------------------------------------|
| female | 1            | 0.03                         | 1.39                                 |
| female | 2            | 0.02                         | 1.05                                 |
| female | 3            | 0.02                         | 1.05                                 |
| female | 4            | 0.02                         | 0.80                                 |
| female | 5            | 0.03                         | 1.25                                 |
| female | 6            | 0.04                         | 1.28                                 |
| female | 7            | 0.05                         | 1.57                                 |
| male   | 1            | 0.03                         | 1.53                                 |
| male   | 2            | 0.03                         | 1.35                                 |
| male   | 3            | 0.03                         | 1.10                                 |
| male   | 4            | 0.03                         | 1.12                                 |
| male   | 5            | 0.03                         | 1.08                                 |
| male   | 6            | 0.03                         | 1.12                                 |
| male   | 7            | 0.05                         | 1.42                                 |
